# Supplementary material for: Insertion of fluorine into a LiFePO4 electrode material by gas–solid fluorination
Source: Royal Society of Chemistry journal article supplement (doi:10.1039/d4dt00603h), 2024-01-01
Supplement: d4dt00603h1.pdf [file d4dt00603h1.pdf]

## Supplementary information : Insertion of fluorine in $\text{LiFePO}_4$ electrode material by gas-solid fluorination

Lemoine Kevin<sup>\*a</sup>, Kenmogne-Debah Roméo<sup>a</sup>, Doubtsof Léa<sup>a</sup>, Frezet Lawrence<sup>a</sup>, Petit Elodie<sup>a</sup>, Guerin Katia<sup>a</sup>, Devouard Bertrand<sup>b,c</sup>, Sougrati Moulay-Tahar<sup>d</sup>, Delbègue Diane<sup>e</sup> and Bonnet Pierre<sup>\*a</sup>

<sup>a</sup>Université Clermont Auvergne, CNRS, ICCF, 24, Avenue Blaise Pascal, 63178 Aubière, France.

<sup>b</sup>Laboratoire Magmas et Volcans, CNRS UMR 6524, Université Clermont Auvergne, IRD, OPGC, 63170 Aubière, France.

<sup>c</sup>CEREGE, Aix Marseille Univ, CNRS, IRD, INRAE, 13545 Aix-en-Provence, France.

<sup>d</sup>ICGM, University of Montpellier, CNRS, ENSCM, Montpellier, France.

<sup>e</sup>Centre National des Etudes Spatiales, 18 avenue Edouard Belin 31 401 Toulouse Cedex 9, France.

\*Corresponding authors :

Lemoine Kevin : kevin.lemoine@uca.fr

Bonnet Pierre : pierre.m.bonnet@uca.fr

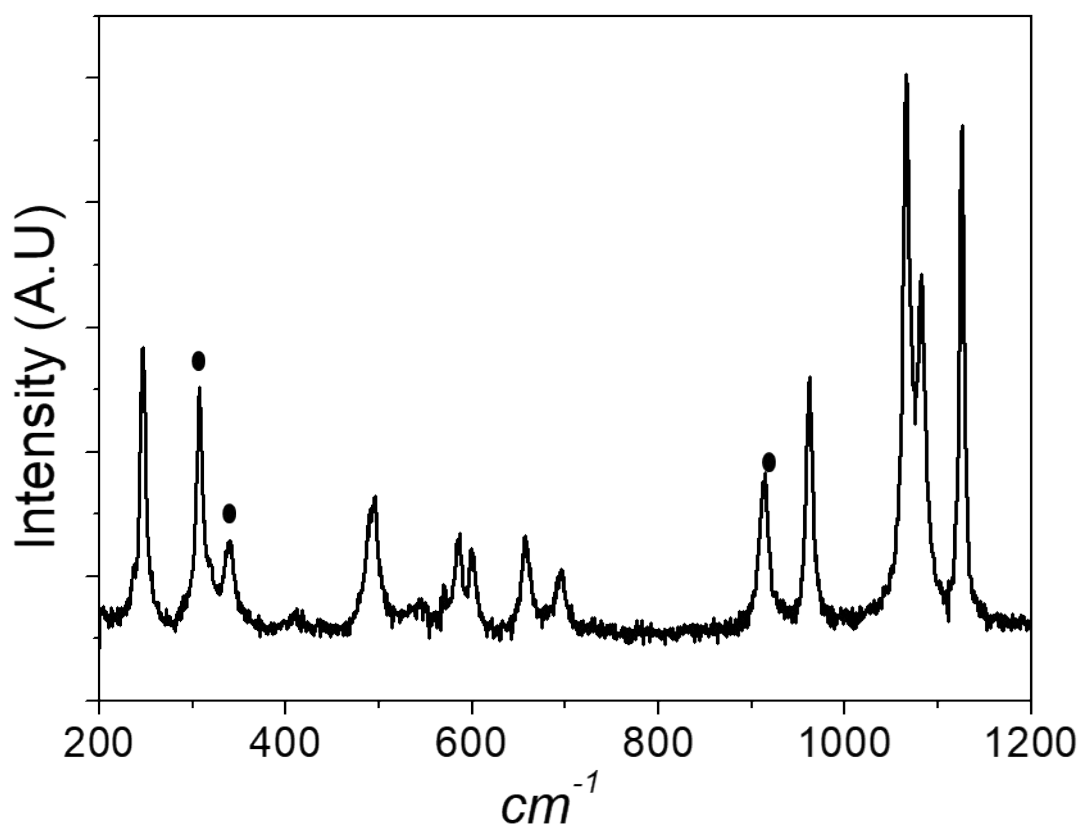

Figure S1 : Raman spectra of  $\text{LiFePO}_4$  fluorinated at  $125^\circ\text{C}$ , black dots corresponding to  $\text{FePO}_4$ .

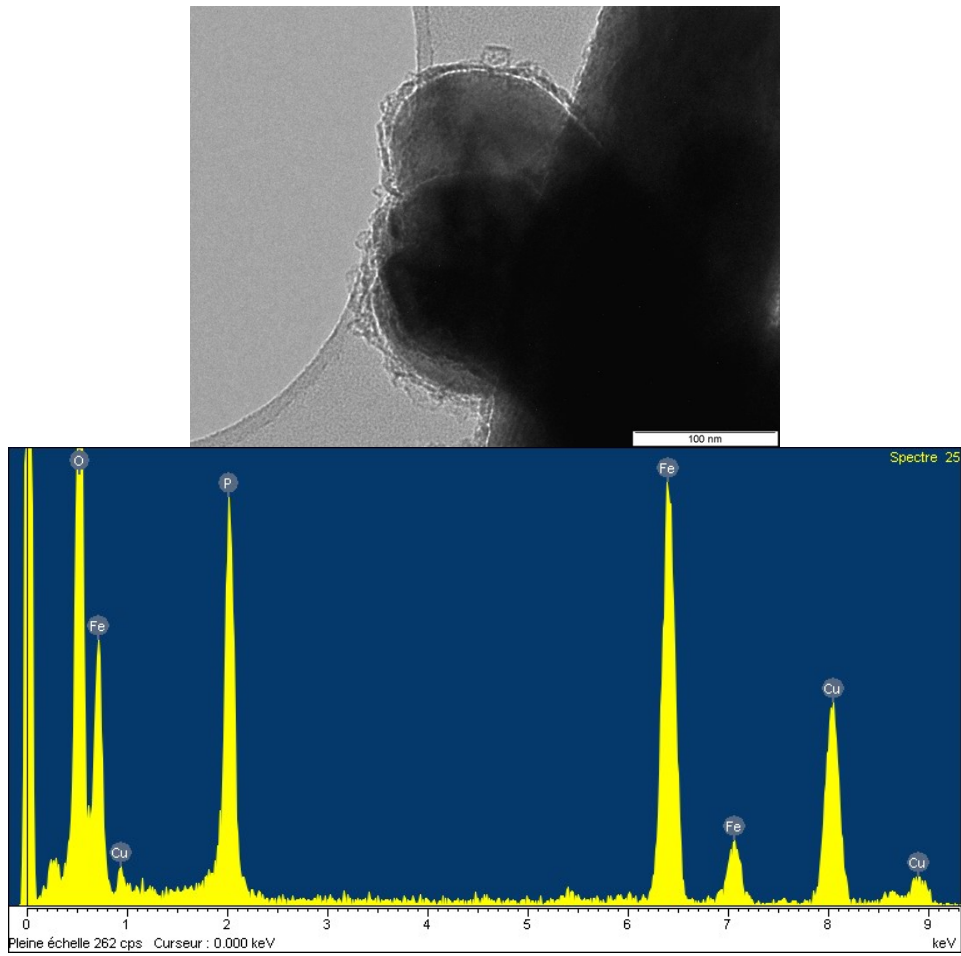

Figure S2 : Transmission electronic microscopy image (TEM) and chemical analysis by Energy Dispersive Spectrometry (TEM-EDS) of  $\text{LiFePO}_4 + \text{F}_2$  125°C particles core.

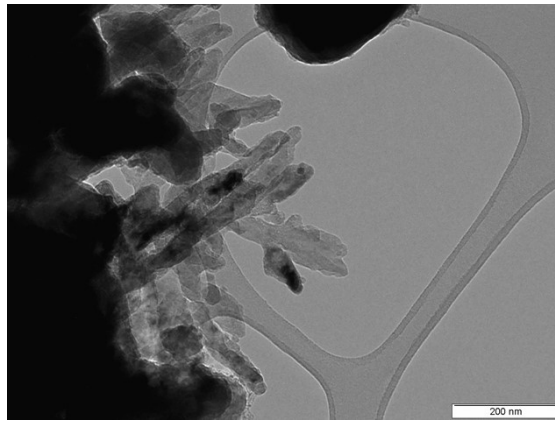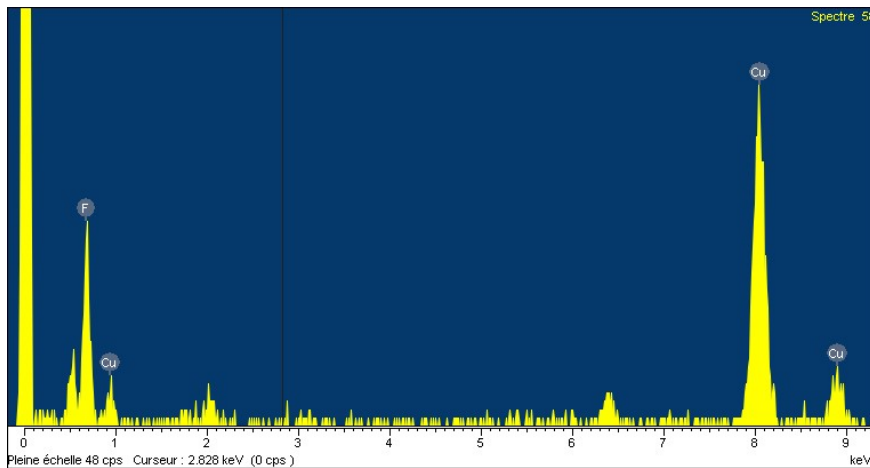

Figure S3 : Transmission electronic microscopy image (TEM) and chemical analysis by Energy Dispersive Spectrometry (TEM-EDS) of  $\text{LiFePO}_4 + \text{F}_2$  125°C particles shell.

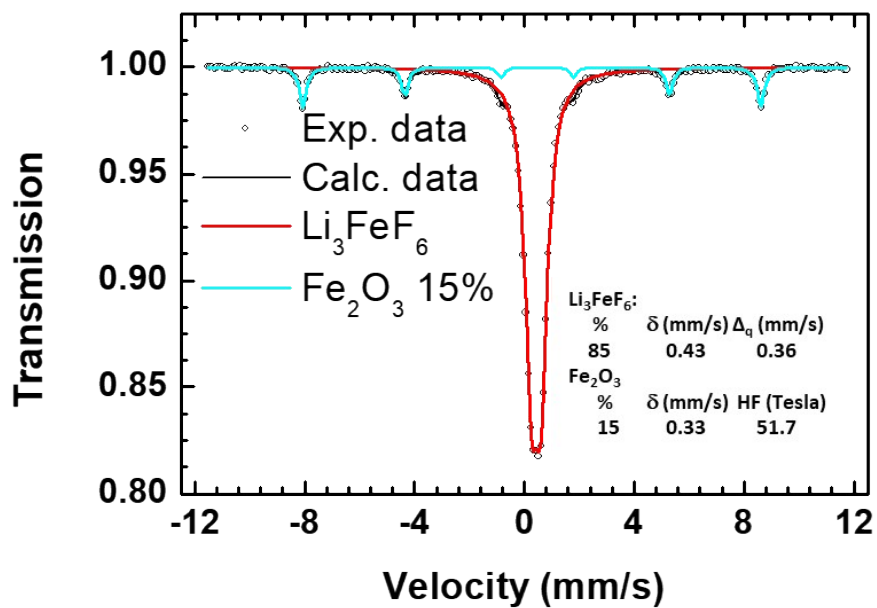

Figure S4 :  $^{57}\text{Fe}$  Mössbauer spectra at 300 K of  $\alpha\text{-Li}_3\text{FeF}_6$  obtained with  $\text{Li}_2\text{CO}_3 + \text{FePO}_4 \cdot 4\text{H}_2\text{O}$  in  $\text{Hf}_{\text{aq}}$  48% with a second treatment under  $\text{F}_2$  at 250°C.  $\text{Fe}_2\text{O}_3$  is obtained as an impurity at 15 %Fe at.

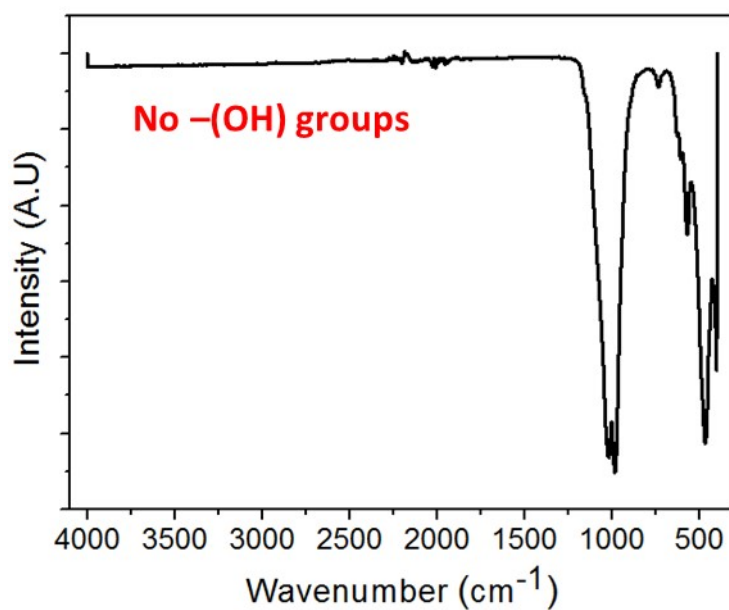

Figure S5 : IR spectra of LiFePO<sub>4</sub> + F<sub>2</sub> 125°C – N<sub>2</sub>.

Table S1: Synthesis conditions for the obtention of the different fluorinated materials

| <b>Coumpound</b>               | <b>Treatment</b>                             | <b>Label</b>                               |                        |
|--------------------------------|----------------------------------------------|--------------------------------------------|------------------------|
| <b>LiFePO<sub>4</sub></b>      | -                                            | LiFePO <sub>4</sub>                        | <b>Pristine</b>        |
|                                | F <sub>2</sub> at RT                         | LiFePO <sub>4</sub> + F <sub>2</sub> - RT  | <b>Low Temperature</b> |
|                                | F <sub>2</sub> at 125°C                      | LiFePO <sub>4</sub> + F <sub>2</sub> - 125 |                        |
|                                | F <sub>2</sub> at 250°C                      | LiFePO <sub>4</sub> + F <sub>2</sub> - 250 |                        |
|                                | F <sub>2</sub> at 350°C                      | LiFePO <sub>4</sub> + F <sub>2</sub> - 350 |                        |
|                                | F <sub>2</sub> at 500°C                      | LiFePO <sub>4</sub> + F <sub>2</sub> - 500 |                        |
| <b>LiFePO<sub>4</sub> -RT</b>  | annealing under N <sub>2</sub> (550°C ; 24h) | LiFePO <sub>4</sub> - RT + N <sub>2</sub>  | <b>Annealed</b>        |
| <b>LiFePO<sub>4</sub> -125</b> | annealing under N <sub>2</sub> (550°C ; 24h) | LiFePO <sub>4</sub> -125 + N <sub>2</sub>  | <b>Annealed</b>        |
